# Supplementary material for: Fatty Acids and a High-Fat Diet Induce Epithelial–Mesenchymal Transition by Activating TGFβ and β-Catenin in Liver Cells
Source: MDPI journal article supplement (doi:10.3390/ijms22031272), 2021-01-28
Supplement: s1 [file s1]

**A.**

Control 1

Control 2

Control 3

Control 4

Control 5

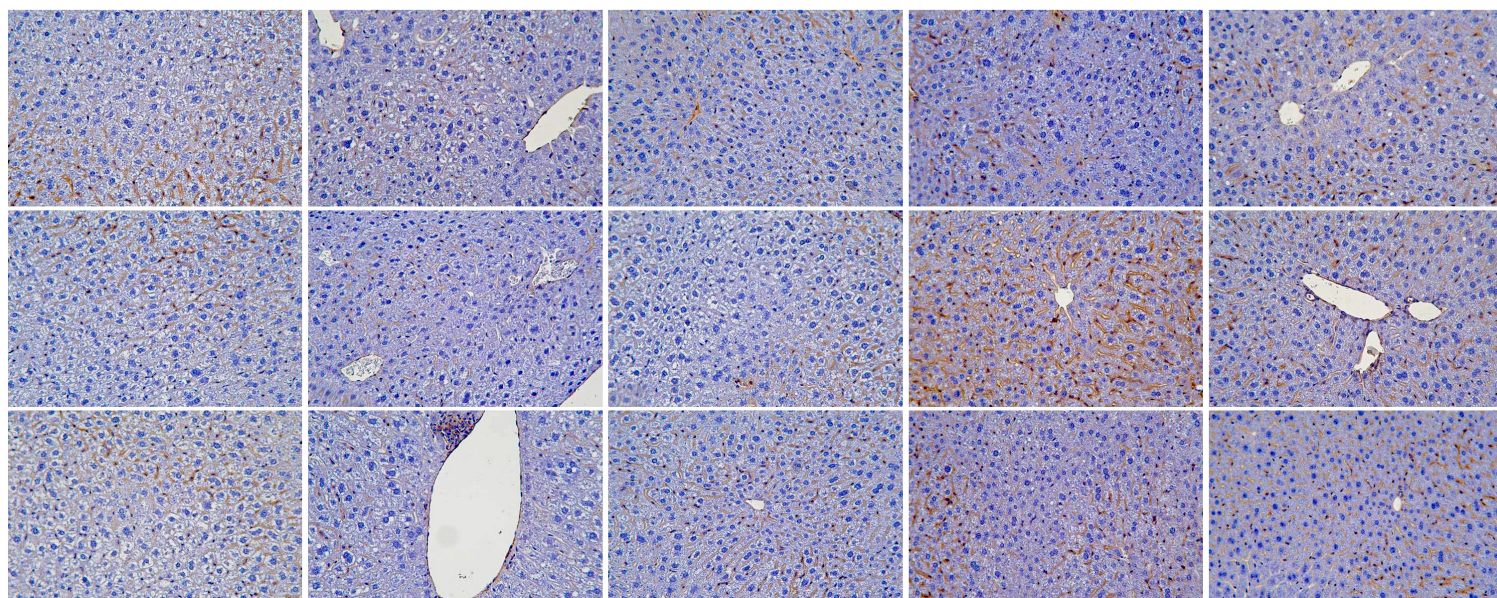

**B.**

HFD 1

HFD 1

HFD 1

HFD 1

HFD 1

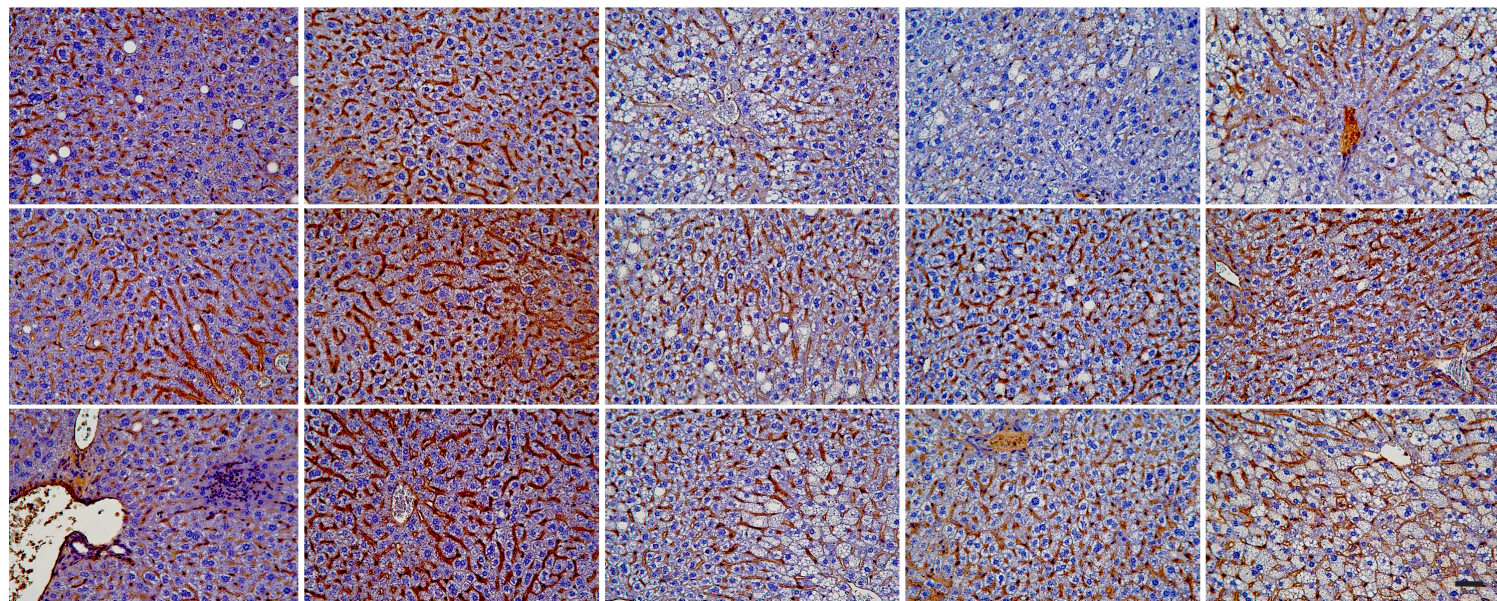



### **Supplementary Figure 1**

The effect of high-fat diet on the deposition of  $\alpha$ -smooth muscle actin ( $\alpha$ -SMA).

Hematoxylin-eosin and  $\alpha$ -SMA staining shows changes in the morphology of liver cells in mice fed a high-fat diet. Immunohistochemical evaluation was performed using primary monoclonal anti-smooth muscle actin antibody (1:100, Dako) and EnVision Detection Systems Peroxidase/DAB, Rabbit/Mouse (Dako). 5 mice on control diet, 5 mice fed high-fat diet (HFD), three fields of view, scale bar 50  $\mu$ m.
